# Supplementary material
Source: PubMed Central journal article supplement (PMC5396148)
Supplement: supp_ptj.20140132_2014-0132.pdf [file supp_ptj.20140132_2014-0132.pdf]

## Outcomes of Physical Therapy for Older Adults With Back Pain

**eTable.**

Missing Outcomes for Study Sample (N=3,771) at 3, 6, and 12 Months

| Variable                               | 3 mo |     | 6 mo |     | 12 mo |     |
|----------------------------------------|------|-----|------|-----|-------|-----|
|                                        | No.  | %   | No.  | %   | No.   | %   |
| Roland-Morris Disability Questionnaire | 284  | 7.5 | 339  | 9.0 | 318   | 8.4 |
| Back pain (numerical rating scale)     | 289  | 7.7 | 339  | 9.0 | 319   | 8.5 |
| Leg pain (numerical rating scale)      | 293  | 7.8 | 341  | 9.0 | 328   | 8.7 |

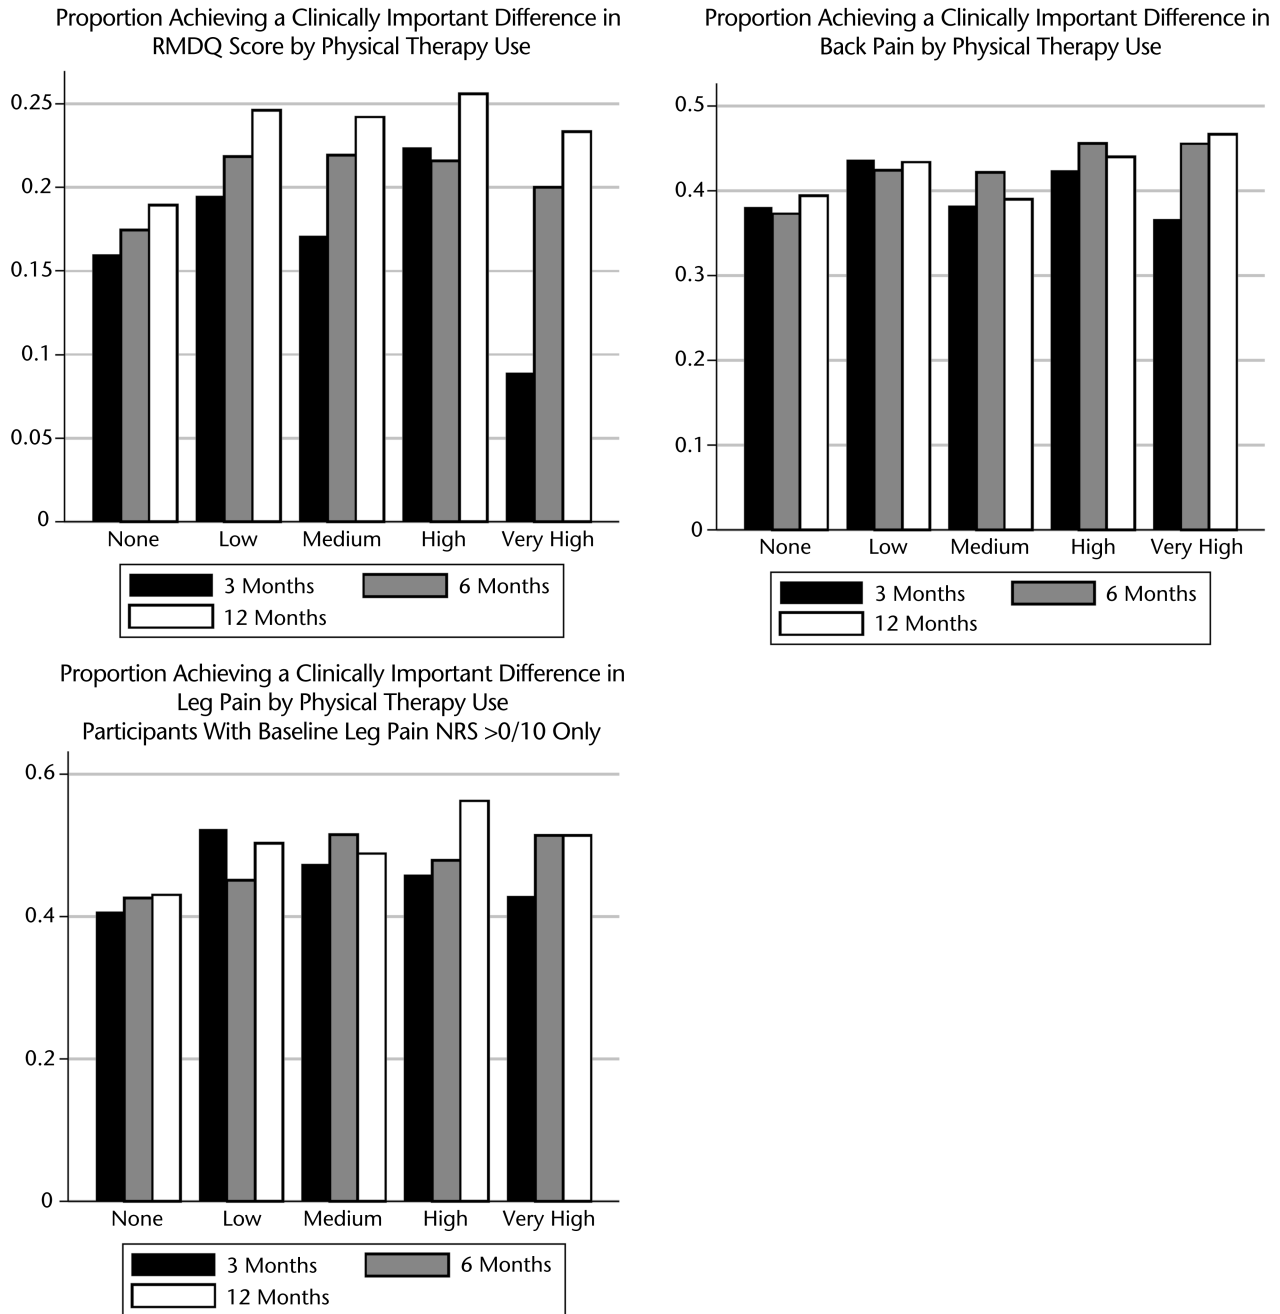

**eFigure.**

Proportion of participants achieving a clinically important difference at each follow-up time by physical therapy use category. NRS=numerical rating scale, RMDQ=Roland-Morris Disability Questionnaire.
